# Supplementary material for: Metal nanoprobe-decorated all-inorganic perovskite nanocrystal-based fluorescence-linked immunosorbent assay for the detection of tumor-derived exosomes
Source: Royal Society of Chemistry journal article supplement (doi:10.1039/d2ay01855a), 2023-01-01
Supplement: d2ay01855a1.pdf [file d2ay01855a1.pdf]

## Supporting Information

### **Metal nanoprobe Decorated All-inorganic Perovskite Nanocrystals-based Fluorescence-Linked Immunosorbent Assay for Detection of Tumor-derived Exosomes**

Zhaoyan Yang <sup>1</sup>, Shenfei Zong <sup>1</sup>, Guohua Jiang <sup>1</sup>, Kai Zhu <sup>1</sup>, Ziting Qian <sup>1</sup>, Kuo Yang <sup>1</sup>,  
Zhuyuan Wang <sup>1\*</sup>, Yiping Cui <sup>1</sup>

*Advanced Photonics Center, School of Electronic Science and Engineering, Southeast University, Nanjing 210096, China*

[wangzy@seu.edu.cn](mailto:wangzy@seu.edu.cn)

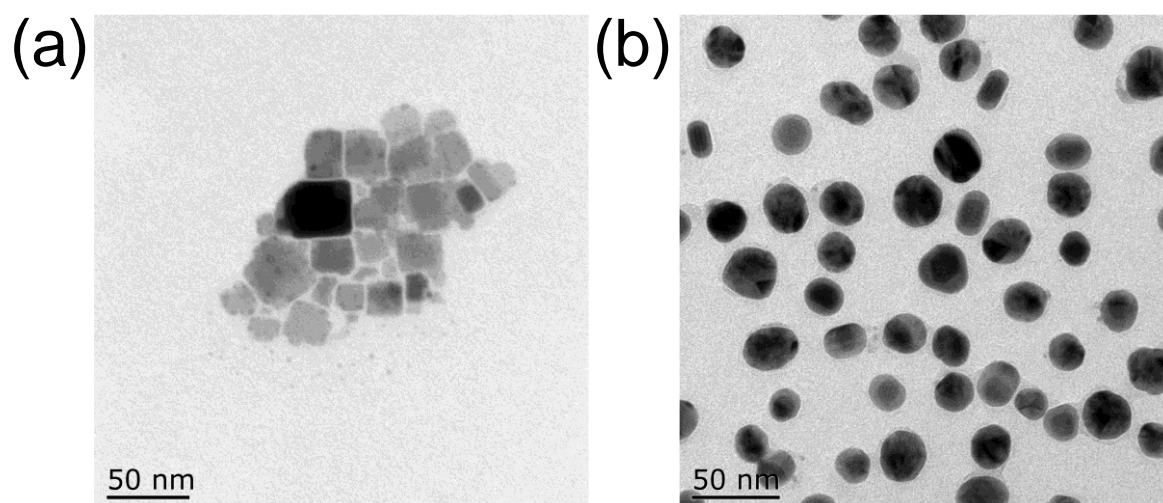

**Figure S1.** TEM images of (a) CsPbBr<sub>3</sub> NCs and (b) Au@Ag nanoparticles.

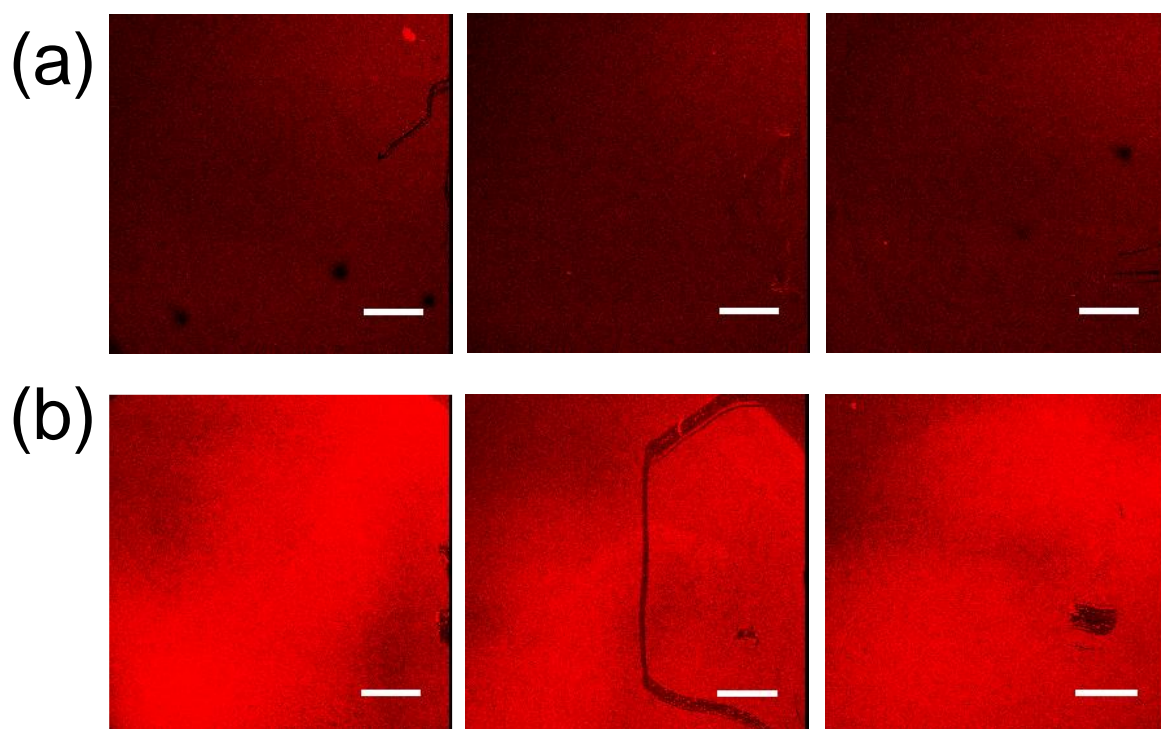

**Figure S2.** The representative fluorescent images of CD63-Cy5 after reacting with (a) PEI layer, and (b) Au@Ag layer on the PEI layer. All scale bars are 200  $\mu\text{m}$ . All the excited wavelengths are 633 nm.

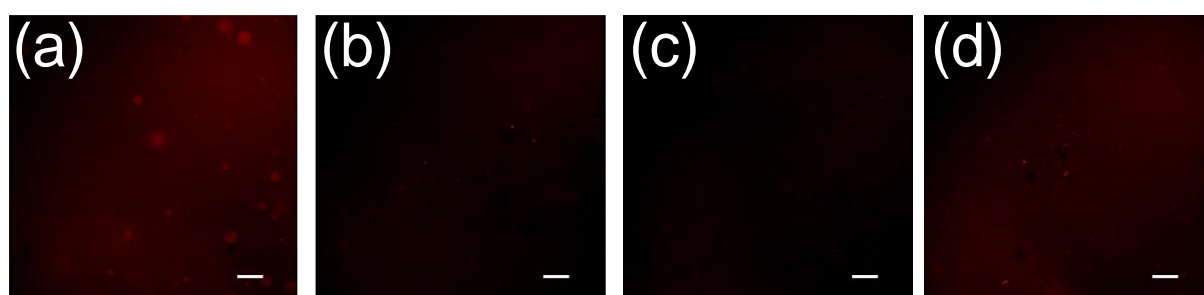

**Figure S3.** The representative fluorescent images that CD63-Cy5 was incubated with Au@Ag layer for (a) 1, (b) 2, (c) 6, and (d) 12 hours. All scale bars are 100  $\mu\text{m}$ . All the excited wavelengths are 633 nm.

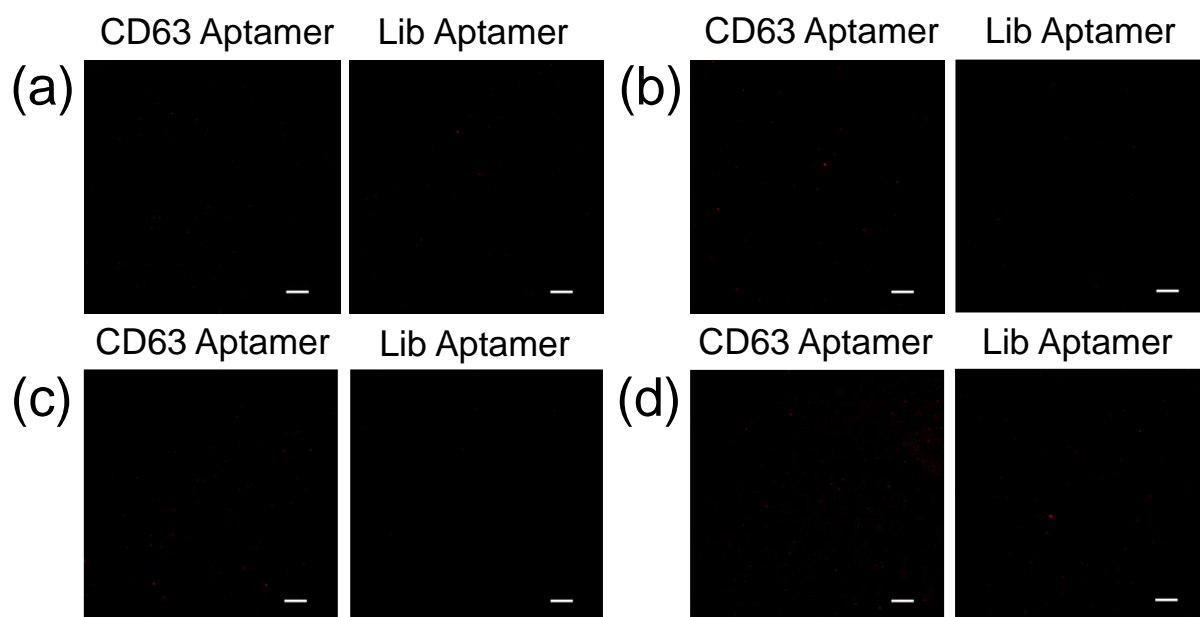

**Figure S4.** The representative fluorescent images that DID-stained SKBR3 exosomes were reacted with CD63 aptamer or Lib aptamer for (a) 1, (b) 3, (c) 5, and (d) 7 hours. Experiment group: CD63 aptamer; Control group: Lib aptamer. All scale bars are 100  $\mu\text{m}$ . All the excited wavelengths are 633 nm.
